# Supplementary material
Source: HighWire-hosted journal article supplement (https://bmjopen.bmj.com/content/12/1/e056347)
Supplement: inline-supplementary-material-1 [file inline-supplementary-material-1.pdf]

## Appendix 1: Inclusion and exclusion criteria

### Inclusion criteria:

A participant was included if the CYP:

- Was aged between 7 and 15 years at the time of randomisation of the school.
- Attended a mainstream school in years two to 10.
- The CYP and parent/guardian had a sufficient understanding of English to be able to provide informed assent/informed consent (as appropriate) and read the LEGO®-based therapy instructions.
- Had an ASD clinical diagnosis from a qualified assessing clinician or team [based on best-practice guidance leading to an ICD-10 or DSM-5 diagnosis as reported by the CYP's parent/guardian and in the CYP's school records (this may have included the school's special educational needs (SEN) register, an individual education plan (IEP), individual health care plan, my support plan (MSPs), education health care plans (EHCPs), individual learning plans (ILP's) or equivalent).
- Had the ability to follow and understand simple instructions (as determined by the associated teacher/TA or parent/guardian).
- Scored 15 or higher on the Social Communication Questionnaire.

A school was included if:

- It was a mainstream school located in Leeds, York, Sheffield or surrounding areas in the North of England. This excludes specialist and independent schools.
- It had not used LEGO®-based therapy with the CYP in the current or preceding school term. For research purposes, LEGO®-based therapy was defined as meeting all of the main fidelity checklist criteria.
- They had at least one CYP diagnosed with ASD (in line with CYP inclusion criteria above)

### Exclusion criteria:

A participant (CYP) was not eligible to take part in the study if:

- They had physical impairments which would prevent them participating in the activities (as assessed by the associated teacher/TA).

## Appendix 2: Flow diagram

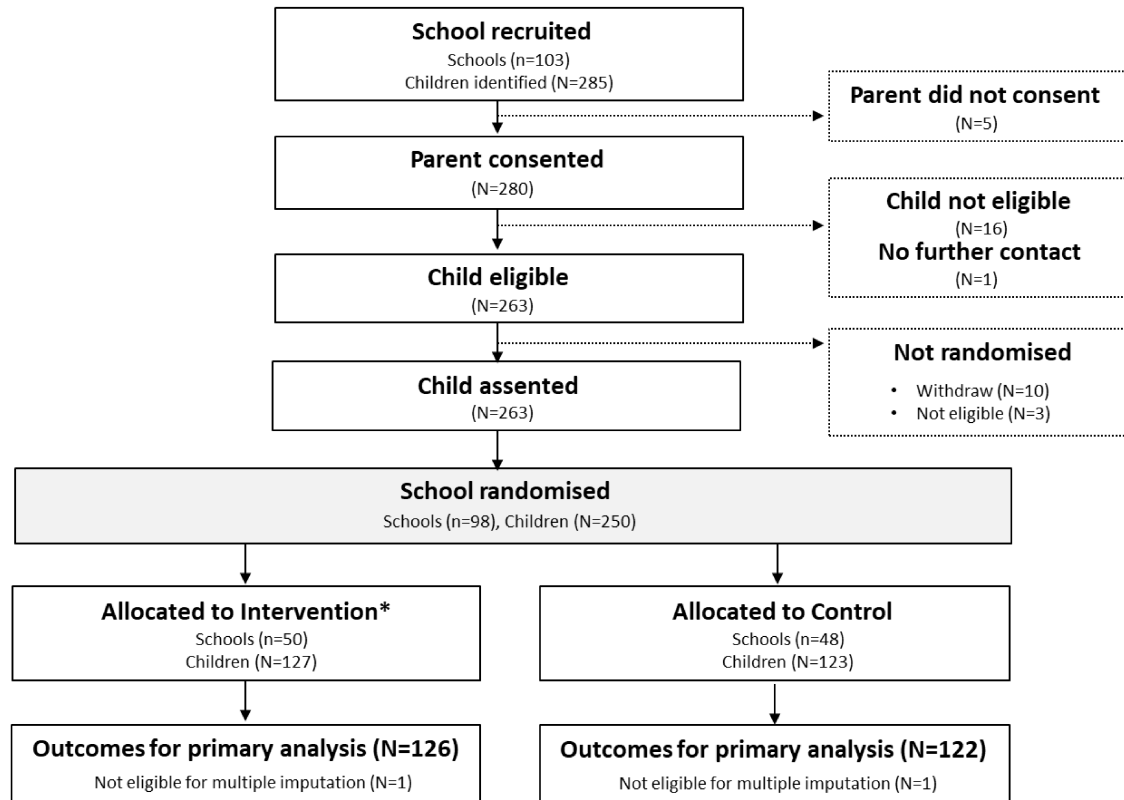

\*following ITT principles, school (n=1) children (N=3) allocated to control, but received intervention are included in the control arm

## Appendix 3: Intervention costs by trial arm

|                        | Total cost (£) | Cost per session per child (£) |
|------------------------|----------------|--------------------------------|
| Training costs         |                |                                |
| Trainer fee            | £4,262         | £2.01                          |
| Refreshment costs      | £10            | £0.00                          |
| Consumable costs       | £178           | £0.08                          |
| Trainer's travel costs | £740           | £0.35                          |
| Total                  | £5,685         | £2.45                          |
| Intervention costs     |                |                                |
| LEGO                   | £3,903         | £1.84                          |
| Intervention           | £4,027         | £1.90                          |
| Additional help        | £77.3          | £0.04                          |
| Consumables            | £580.5         | £0.27                          |
| Total                  | £8,587.8       | £4.05                          |

## Appendix 4: Average service use by trial arm (complete case, n=139)

|                                          |             | Baseline                     |                     | 0-20 weeks                   |                       | 20-52 weeks                  |                       |
|------------------------------------------|-------------|------------------------------|---------------------|------------------------------|-----------------------|------------------------------|-----------------------|
|                                          |             | LEGO®-based<br>therapy, N=80 | Usual care,<br>N=59 | LEGO®-based<br>therapy, N=80 | Usual support<br>N=59 | LEGO®-based<br>therapy, N=80 | Usual support<br>N=59 |
| Unit                                     |             | Mean (sd)                    | Mean (sd)           | Mean (sd)                    | Mean (sd)             | Mean (sd)                    | Mean (sd)             |
| <b>NHS and PSS</b>                       |             |                              |                     |                              |                       |                              |                       |
| Community-based services                 |             |                              |                     |                              |                       |                              |                       |
| CAMHS related                            | Session     | 0.70 (2.76)                  | 0.31 (0.88)         | 0.23 (0.88)                  | 0.36 (1.06)           | 0.63 (2.81)                  | 0.54 (2.46)           |
| Non-CAMHS related                        |             |                              |                     |                              |                       |                              |                       |
| GP                                       | Appointment | 0.45 (0.97)                  | 0.24 (0.50)         | 0.39 (1.02)                  | 0.22 (0.49)           | 0.71 (1.41)                  | 0.66 (0.96)           |
| Allied health professionals              | Appointment | 0.44 (0.93)                  | 0.68 (2.20)         | 0.43 (1.00)                  | 0.34 (0.71)           | 0.78 (1.96)                  | 0.69 (1.56)           |
| Social care services                     | Appointment | 0.49 (1.65)                  | 0.47 (1.34)         | 0.26 (1.00)                  | 0.39 (2.11)           | 0.99 (2.62)                  | 0.80 (2.06)           |
| Hospital-based services / acute services |             |                              |                     |                              |                       |                              |                       |
| Emergency services                       | Visit       | 0.19 (0.80)                  | 0.12 (0.46)         | 0.13 (0.43)                  | 0.03 (0.26)           | 0.20 (0.60)                  | 0.17 (0.62)           |
| Inpatient stay                           |             |                              |                     |                              |                       |                              |                       |
| Mental health related                    | Night       | -                            | -                   | -                            | -                     | -                            | -                     |
| Non-mental health related                | Night       | 0.01 (0.11)                  | -                   | 0.01 (0.11)                  | -                     | -                            | -                     |
| Outpatient visit / day case              |             |                              |                     |                              |                       |                              |                       |
| Mental health related                    | Visit       | 0.06 (0.37)                  | 0.10 (0.44)         | 0.08 (0.38)                  | 0.07 (0.31)           | 0.05 (0.22)                  | 0.29 (1.37)           |
| Non-mental health related                | Visit       | 0.31 (1.71)                  | 0.17 (0.59)         | 0.19 (0.75)                  | 0.24 (0.63)           | 0.09 (0.40)                  | 0.24 (0.95)           |
| Medication                               |             |                              |                     |                              |                       |                              |                       |
| Mental health related                    | Type        | 0.36 (0.80)                  | 0.20 (0.48)         | 0.43 (0.81)                  | 0.27 (0.55)           | 0.48 (0.87)                  | 0.32 (0.51)           |
| Non-mental health related                | Type        | 0.33 (0.62)                  | 0.41 (0.93)         | 0.41 (0.90)                  | 0.53 (1.33)           | 0.38 (0.79)                  | 0.59 (1.23)           |
| <b>Education system related</b>          |             |                              |                     |                              |                       |                              |                       |

|                                         |         |              |              |             |              |               |               |
|-----------------------------------------|---------|--------------|--------------|-------------|--------------|---------------|---------------|
| School-based health                     | Hour    | 2.60 (10.00) | 2.17 (6.94)  | 1.40 (5.80) | 3.12 (10.51) | 8.80 (32.99)  | 2.17 (10.06)  |
| General support*                        | Hour    | 8.54 (7.26)  | 7.93 (12.68) | 7.48 (9.25) | 9.37 (17.34) | 18.94 (30.32) | 27.32 (45.13) |
| Intervention support*                   | Hour    | 5.50 (10.50) | 4.66 (6.74)  | 6.78 (8.28) | 7.15 (11.03) | 8.37 (7.97)   | 7.72 (10.56)  |
| <b>Private expenses – out of pocket</b> |         |              |              |             |              |               |               |
| Childcare                               | Session | 3.05 (7.35)  | 4.10 (11.05) | 4.14 (9.30) | 5.98 (12.37) | 5.86 (13.58)  | 12.29 (25.20) |
| <b>Productivity</b>                     |         |              |              |             |              |               |               |
| Parental productivity                   | Day     | 0.45 (1.18)  | 0.31 (0.93)  | 0.45 (1.04) | 0.52 (1.51)  | 0.58 (1.13)   | 0.59 (1.40)   |

CAMHS: Child and Adolescent Mental Health Services, including child psychiatrist, child psychotherapist, child psychologist, clinical psychologist, mental health nurse, family therapist, and Primary mental health worker (PMHW)

Allied health professionals included community nurse, community paediatrician, occupational therapist, physiotherapist, and Speech and Language therapist

Social care services included social care worker, home care worker, family support worker, drug and alcohol support worker, and Helpline (e.g. Samaritans)

Childcare included paid childcare, after school club, religious club, and special clubs for autism children

\*based on 117 teacher-reported questionnaires (68 from I-socialise arm and 48 from usual care arm)

## Appendix 5: EQ-5D-Y responses by trial arms by data collection time points

| Usual support (n=59)      | Baseline  |           |           | 20 Weeks  |           |           | 52 Weeks  |           |           |
|---------------------------|-----------|-----------|-----------|-----------|-----------|-----------|-----------|-----------|-----------|
|                           | Level 1   | Level 2   | Level 3   | Level 1   | Level 2   | Level 3   | Level 1   | Level 2   | Level 3   |
|                           | n (%)     | n (%)     | n (%)     | n (%)     | n (%)     | n (%)     | n (%)     | n (%)     | n (%)     |
| Mobility                  | 52 (88.1) | 7 (11.9)  | -         | 46 (78.0) | 13 (22.0) | -         | 46 (78.0) | 13 (22.0) | -         |
| Self-care                 | 17 (28.8) | 32 (54.2) | 10 (17.0) | 16 (27.1) | 37 (62.7) | 6 (10.2)  | 14 (23.7) | 35 (59.3) | 10 (17.0) |
| Usual activity            | 25 (42.4) | 29 (49.1) | 5 (8.5)   | 25 (42.4) | 27 (45.8) | 7 (11.8)  | 22 (37.3) | 30 (50.8) | 7 (11.9)  |
| Pain/discomfort           | 45 (76.3) | 13 (22.0) | 1 (1.7)   | 37 (62.7) | 22 (37.3) | -         | 38 (64.4) | 21 (35.6) | -         |
| Anxiety/depression        | 15 (25.4) | 35 (59.3) | 9 (15.3)  | 16 (27.1) | 34 (57.6) | 9 (15.3)  | 18 (30.5) | 26 (44.1) | 15 (25.4) |
| Lego-based therapy (n=80) | Baseline  |           |           | 20 Weeks  |           |           | 52 Weeks  |           |           |
|                           | Level 1   | Level 2   | Level 3   | Level 1   | Level 2   | Level 3   | Level 1   | Level 2   | Level 3   |
|                           | n (%)     | n (%)     | n (%)     | n (%)     | n (%)     | n (%)     | n (%)     | n (%)     | n (%)     |
| Mobility                  | 66 (82.5) | 11 (13.7) | 3 (3.8)   | 61 (76.2) | 16 (20.0) | 3 (3.8)   | 64 (80.0) | 13 (16.2) | 3 (3.8)   |
| Self-care                 | 25 (31.3) | 36 (45.0) | 19 (23.7) | 26 (32.5) | 42 (52.5) | 12 (15.0) | 29 (36.3) | 36 (45.0) | 15 (18.7) |
| Usual activity            | 33 (41.2) | 41 (51.2) | 6 (7.5)   | 35 (43.7) | 36 (45.0) | 9 (11.3)  | 43 (53.7) | 33 (41.3) | 4 (5.0)   |
| Pain/discomfort           | 64 (80.0) | 14 (17.5) | 2 (2.5)   | 63 (78.7) | 13 (16.3) | 4 (5.0)   | 59 (73.8) | 19 (23.7) | 2 (2.5)   |
| Anxiety/depression        | 40 (50.0) | 33 (41.3) | 7 (8.7)   | 37 (46.2) | 34 (42.5) | 9 (11.3)  | 39 (48.7) | 29 (36.3) | 12 (15.0) |

\*Level 1: none, Level 2: some, Level 3: extreme

## Appendix 6: CHU-9D responses by trial arms by data collection time points

| Usual support (n=45)      | Baseline  |           |           |          |           | 20 weeks  |           |           |          |          | 52 weeks  |           |           |          |          |
|---------------------------|-----------|-----------|-----------|----------|-----------|-----------|-----------|-----------|----------|----------|-----------|-----------|-----------|----------|----------|
|                           | Level 1   | Level 2   | Level 3   | Level 4  | Level 5   | Level 1   | Level 2   | Level 3   | Level 4  | Level 5  | Level 1   | Level 2   | Level 3   | Level 4  | Level 5  |
| Worried                   | 20 (44.4) | 16 (35.6) | 7 (15.6)  | -        | 2 (4.4)   | 22 (48.9) | 12 (26.7) | 5 (11.1)  | 3 (6.7)  | 3 (6.7)  | 26 (57.8) | 13 (28.9) | 1 (2.2)   | 3 (6.7)  | 2 (4.4)  |
| Sad                       | 32 (71.1) | 8 (17.8)  | 2 (4.4)   | 2 (4.4)  | 1 (2.2)   | 29 (64.4) | 6 (13.3)  | 5 (11.1)  | 4 (8.9)  | 1 (2.2)  | 34 (75.6) | 4 (8.9)   | 2 (4.4)   | 1 (2.2)  | 4 (8.9)  |
| Annoyed                   | 27 (60.0) | 13 (28.9) | 4 (8.9)   | -        | 1 (2.2)   | 27 (60.0) | 10 (22.2) | 5 (11.1)  | -        | 3 (6.7)  | 27 (60.0) | 10 (22.2) | 5 (11.1)  | 2 (4.4)  | 1 (2.2)  |
| Tired                     | 9 (20.0)  | 15 (33.3) | 8 (17.8)  | 5 (11.1) | 8 (17.8)  | 12 (26.7) | 13 (28.9) | 9 (20.0)  | 5 (11.1) | 6 (13.3) | 10 (22.2) | 16 (35.6) | 6 (13.3)  | 6 (13.3) | 7 (15.6) |
| Pain                      | 28 (62.2) | 6 (13.3)  | 6 (13.3)  | 3 (6.7)  | 2 (4.4)   | 21 (46.7) | 11 (24.4) | 4 (8.9)   | 2 (4.4)  | 7 (15.6) | 24 (53.3) | 12 (26.7) | 7 (15.6)  | -        | 2 (4.4)  |
| Sleep                     | 21 (46.7) | 12 (26.7) | 5 (11.1)  | 3 (6.7)  | 4 (8.9)   | 20 (44.4) | 3 (6.7)   | 7 (15.6)  | 9 (20.0) | 6 (13.3) | 17 (37.8) | 16 (35.6) | 4 (8.9)   | 4 (8.9)  | 4 (8.9)  |
| Daily routine             | 23 (51.1) | 12 (26.7) | 4 (8.9)   | 3 (6.7)  | 3 (6.7)   | 19 (42.2) | 11 (24.4) | 7 (15.6)  | 4 (8.9)  | 4 (8.9)  | 24 (53.3) | 10 (22.2) | 5 (11.1)  | 3 (6.7)  | 3 (6.7)  |
| Work                      | 27 (60.0) | 15 (33.3) | 2 (4.4)   | 1 (2.2)  | -         | 23 (51.1) | 11 (24.4) | 7 (15.6)  | 1 (2.2)  | 3 (6.7)  | 28 (62.2) | 7 (15.6)  | 7 (15.6)  | 1 (2.2)  | 2 (4.4)  |
| Able to join activities   | 23 (51.1) | 6 (13.3)  | 10 (22.2) | 3 (6.7)  | 3 (6.7)   | 10 (22.2) | 14 (31.1) | 10 (22.2) | 9 (20.0) | 2 (4.4)  | 20 (44.4) | 10 (22.2) | 10 (22.2) | 1 (2.2)  | 4 (8.9)  |
| Lego-based therapy (n=51) | Baseline  |           |           |          |           | 20 weeks  |           |           |          |          | 52 weeks  |           |           |          |          |
|                           | Level 1   | Level 2   | Level 3   | Level 4  | Level 5   | Level 1   | Level 2   | Level 3   | Level 4  | Level 5  | Level 1   | Level 2   | Level 3   | Level 4  | Level 5  |
| Worried                   | 34 (66.7) | 8 (15.7)  | 3 (5.9)   | 2 (3.9)  | 4 (7.8)   | 33 (64.7) | 6 (11.8)  | 7 (13.7)  | 1 (2.0)  | 4 (7.8)  | 34 (66.7) | 7 (13.7)  | 6 (11.8)  | 3 (5.9)  | 1 (2.0)  |
| Sad                       | 40 (78.4) | 5 (9.8)   | 2 (3.9)   | 1 (2.0)  | 3 (5.9)   | 37 (72.5) | 5 (9.8)   | 5 (9.8)   | 1 (2.0)  | 3 (5.9)  | 36 (70.6) | 6 (11.8)  | 6 (11.8)  | 2 (3.9)  | 1 (2.0)  |
| Annoyed                   | 37 (72.5) | 7 (13.7)  | 4 (7.8)   | 2 (3.9)  | 1 (2.0)   | 34 (66.7) | 10 (19.6) | 5 (9.8)   | -        | 2 (3.9)  | 37 (72.5) | 8 (15.7)  | 3 (5.9)   | 1 (2.0)  | 2 (3.9)  |
| Tired                     | 14 (27.5) | 19 (37.3) | 5 (9.8)   | 3 (5.9)  | 10 (19.6) | 17 (33.3) | 19 (37.3) | 4 (7.8)   | 7 (13.7) | 4 (7.8)  | 13 (25.5) | 19 (37.3) | 6 (11.8)  | 4 (7.8)  | 9 (17.6) |
| Pain                      | 33 (64.7) | 9 (17.6)  | 3 (5.9)   | 1 (2.0)  | 5 (9.8)   | 28 (54.9) | 9 (17.6)  | 7 (13.7)  | 3 (5.9)  | 4 (7.8)  | 27 (52.9) | 13 (25.5) | 6 (11.8)  | 3 (5.9)  | 2 (3.9)  |
| Sleep                     | 26 (51.0) | 10 (19.6) | 6 (11.8)  | 3 (5.9)  | 6 (11.8)  | 23 (45.1) | 8 (15.7)  | 8 (15.7)  | 4 (7.8)  | 8 (15.7) | 20 (39.2) | 11 (21.6) | 11 (21.6) | 3 (5.9)  | 6 (11.8) |
| Daily routine             | 29 (56.9) | 8 (15.7)  | 4 (7.8)   | 4 (7.8)  | 6 (11.8)  | 24 (47.1) | 15 (29.4) | 7 (13.7)  | 3 (5.9)  | 2 (3.9)  | 27 (52.9) | 12 (23.5) | 8 (15.7)  | 3 (5.9)  | 1 (2.0)  |
| Work                      | 34 (66.7) | 7 (13.7)  | 6 (11.8)  | 1 (2.0)  | 3 (5.9)   | 33 (64.7) | 10 (19.6) | 5 (9.8)   | 3 (5.9)  | -        | 32 (62.7) | 11 (21.6) | 4 (7.8)   | 2 (3.9)  | 2 (3.9)  |
| Able to join activities   | 30 (58.8) | 6 (11.8)  | 5 (9.8)   | 4 (7.8)  | 6 (11.8)  | 24 (47.1) | 8 (15.7)  | 6 (11.8)  | 8 (15.7) | 5 (9.8)  | 20 (39.2) | 10 (19.6) | 7 (13.7)  | 8 (15.7) | 6 (11.8) |

\* Level 1: No, Level 2: A little bit, Level 3: A bit, Level 4: Quite a lot, Level 5 Very

## Appendix 7: Sensitivity analyses

| <b>LEGO®-based therapy vs. usual support</b>            | <b>Incremental costs (£), (95% CI)</b> | <b>Incremental QALYs (95% CI)</b> | <b>ICER (£/QALY gained), (95% CI)</b> |
|---------------------------------------------------------|----------------------------------------|-----------------------------------|---------------------------------------|
| Scenario 1: Complete case analysis from NHS perspective | -1,280<br>(-4,578 to 2,081)            | 0.011<br>(-0.017 to 0.040)        | Dominant                              |
| Scenario 2: CUA from NHS and education perspective      | -511<br>(-1,452 to 392)                | 0.009<br>(-0.008 to 0.028)        | Dominant                              |
| Scenario 3: CUA from societal perspective               | -376<br>(-1,377 to 595)                | 0.009<br>(-0.008, 0.028)          | Dominant                              |
| Scenario 4: Assume outcomes were measured using CHU-9D  | -246<br>(-719 to 246)                  | 0.029<br>(0.009 to 0.049)         | Dominant                              |
